# Supplementary material
Source: HighWire-hosted journal article supplement (https://jnm.snmjournals.org/highwire/filestream/95020/field_highwire_adjunct_files/0/179663_Supplemental_Data.pdf)
Supplement: 179663_Supplemental_Data.pdf [file 179663_Supplemental_Data.pdf]

**Supplemental Table 1.** Description of patients imaged with <sup>68</sup>Ga-pentixafor-PET-MRI and quantification of tracer uptake in carotid arteries.

| Patients  | Gender | Age | Side | Carotid stenosis | Symptomatic | Mean TBR | MDS TBR |
|-----------|--------|-----|------|------------------|-------------|----------|---------|
| Patient 1 | Male   | 64  | R    | < 50 %           | No          | 2.0      | 2.4     |
|           |        |     | L    | > 70 %           | Yes         | 2.2      | 2.6     |
| Patient 2 | Male   | 74  | R    | > 70 %           | Yes         | 2.0      | 2.1     |
|           |        |     | L    | > 50 %           | No          | 2.1      | 2.5     |
| Patient 3 | Female | 71  | R    | > 70 %           | Yes         | 1.6      | 1.7     |
|           |        |     | L    | < 50 %           | No          | 1.5      | 1.7     |
| Patient 4 | Male   | 75  | R    | > 70 %           | No          | 1.4      | 1.4     |
|           |        |     | L    | Former CEA       | No          | 1.4      | 1.6     |
| Patient 5 | Male   | 77  | R    | < 30 %           | No          | 1.2      | 1.3     |
|           |        |     | L    | < 30 %           | No          | 1.2      | 1.3     |
| Patient 6 | Male   | 69  | R    | < 30 %           | No          | 1.2      | 1.3     |
|           |        |     | L    | < 30 %           | No          | 1.2      | 1.5     |
| Patient 7 | Male   | 69  | R    | < 30 %           | No          | 1.4      | 1.5     |
|           |        |     | L    | < 30 %           | No          | 1.3      | 1.4     |
| Patient 8 | Male   | 62  | R    | < 30 %           | No          | 1.5      | 1.6     |
|           |        |     | L    | < 30 %           | No          | 1.6      | 1.9     |
